# Supplementary material for: Chiral arylideneaminoimidazolidin-4-ones: green synthesis and isomerisation mechanism in solution
Source: Royal Society of Chemistry journal article supplement (doi:10.1039/c9nj00022d), 2019-01-01
Supplement: c9nj00022d1.pdf [file c9nj00022d1.pdf]

## Chiral arylideneaminoimidazolidin-4-ones: green synthesis and isomerization mechanism in solution

Nadia Bouzayani,<sup>a</sup> Sylvain Marque,<sup>\*b</sup> Yakdhane Kacem,<sup>\*a</sup> Jamil Kraïem,<sup>c</sup> Flavien Bourdreux,<sup>b</sup> Jérôme Marrot<sup>b</sup> and Béchir Ben Hassine<sup>a</sup>

<sup>a</sup> Laboratoire de Synthèse Organique Asymétrique et Catalyse Homogène, (UR 11ES56) Université de Monastir, Faculté des Sciences de Monastir, avenue de l'environnement, 5000 Monastir, Tunisie. Fax: (+216) 73 500 278; Tel: (+216) 73 500 275.

<sup>b</sup> Université de Versailles, Saint-Quentin-en-Yvelines, Institut Lavoisier de Versailles (ILV), UMR CNRS 8180, 45 avenue des Etats-Unis, 78035 Versailles Cedex, France.

<sup>c</sup> Laboratoire de Développement Chimique, Galénique et Pharmacologique des Médicaments, Faculté de Pharmacie de Monastir, Université de Monastir, Rue Avicenne, 5000 Monastir, Tunisie.

### Table of contents

#### 1. Crystallographic data

|                                            |    |
|--------------------------------------------|----|
| a. Crystallization                         | S3 |
| b. Photographs of crystals <b>5f</b>       | S4 |
| c. Main structure information of <b>5f</b> | S5 |

#### 2. Water sensitivity of the products **5a-m**

#### 3. Calculations

|                                                                                                             |     |
|-------------------------------------------------------------------------------------------------------------|-----|
| a. Energies conversions                                                                                     | S7  |
| b. Species (1 <i>R</i> <sub>N</sub> ,2 <i>R</i> <sub>C</sub> ,5 <i>S</i> <sub>C</sub> )-(E) out – <b>5b</b> | S8  |
| c. Species (1 <i>R</i> <sub>N</sub> ,2 <i>R</i> <sub>C</sub> ,5 <i>S</i> <sub>C</sub> )-(E) in – <b>5b</b>  | S9  |
| d. Species (1 <i>R</i> <sub>N</sub> ,2 <i>R</i> <sub>C</sub> ,5 <i>S</i> <sub>C</sub> )-(Z) – <b>5b</b>     | S10 |
| e. Species (1 <i>R</i> <sub>N</sub> ,2 <i>S</i> <sub>C</sub> ,5 <i>S</i> <sub>C</sub> )-(E) out – <b>5b</b> | S11 |
| f. Species (1 <i>R</i> <sub>N</sub> ,2 <i>S</i> <sub>C</sub> ,5 <i>S</i> <sub>C</sub> )-(Z) – <b>5b</b>     | S12 |
| g. Species (1 <i>R</i> <sub>N</sub> ,2 <i>S</i> <sub>C</sub> ,5 <i>S</i> <sub>C</sub> )-(Z) – <b>5b</b>     | S13 |
| h. Species (1 <i>S</i> <sub>N</sub> ,2 <i>R</i> <sub>C</sub> ,5 <i>S</i> <sub>C</sub> )-(E) out – <b>5b</b> | S14 |
| i. Species (1 <i>S</i> <sub>N</sub> ,2 <i>R</i> <sub>C</sub> ,5 <i>S</i> <sub>C</sub> )-(E) in – <b>5b</b>  | S15 |
| j. Species (1 <i>S</i> <sub>N</sub> ,2 <i>R</i> <sub>C</sub> ,5 <i>S</i> <sub>C</sub> )-(Z) – <b>5b</b>     | S16 |
| k. Species (1 <i>S</i> <sub>N</sub> ,2 <i>S</i> <sub>C</sub> ,5 <i>S</i> <sub>C</sub> )-(E) out – <b>5b</b> | S17 |
| l. Species (1 <i>S</i> <sub>N</sub> ,2 <i>S</i> <sub>C</sub> ,5 <i>S</i> <sub>C</sub> )-(Z) – <b>5b</b>     | S18 |
| m. Species (1 <i>S</i> <sub>N</sub> ,2 <i>S</i> <sub>C</sub> ,5 <i>S</i> <sub>C</sub> )-(Z) – <b>5b</b>     | S19 |
| n. Species (1 <i>R</i> <sub>N</sub> ,2 <i>R</i> <sub>C</sub> ,5 <i>S</i> <sub>C</sub> )-(E) out – <b>5f</b> | S20 |
| o. Species (1 <i>R</i> <sub>N</sub> ,2 <i>S</i> <sub>C</sub> ,5 <i>S</i> <sub>C</sub> )-(E) out – <b>5f</b> | S21 |
| p. Species (1 <i>S</i> <sub>N</sub> ,2 <i>R</i> <sub>C</sub> ,5 <i>S</i> <sub>C</sub> )-(E) out – <b>5f</b> | S22 |
| q. Species (1 <i>S</i> <sub>N</sub> ,2 <i>S</i> <sub>C</sub> ,5 <i>S</i> <sub>C</sub> )-(E) out – <b>5f</b> | S23 |

#### 4. Spectrum section for compounds characterization

|                             |     |
|-----------------------------|-----|
| a. NMR spectra of <b>5a</b> |     |
| b. NMR spectra of <b>5b</b> |     |
| c. NMR spectra of <b>5c</b> |     |
| d. NMR spectra of <b>5d</b> |     |
| e. NMR spectra of <b>5e</b> |     |
| f. NMR spectra of <b>5f</b> | S24 |
| g. NMR spectra of <b>5g</b> | S30 |
| h. NMR spectra of <b>5h</b> | S38 |
| i. NMR spectra of <b>5i</b> | S45 |
| j. NMR spectra of <b>5j</b> | S50 |
| h. NMR spectra of <b>5k</b> | S56 |
| i. NMR spectra of <b>5l</b> | S61 |
| j. NMR spectra of <b>5m</b> | S67 |

#### 5. Spectrum section for kinetic behaviors

|                             |      |
|-----------------------------|------|
|                             | S74  |
|                             | S80  |
|                             | S87  |
| a. NMR spectra of <b>5a</b> | S94  |
| b. NMR spectra of <b>5b</b> | S100 |
| c. NMR spectra of <b>5c</b> |      |
| d. NMR spectra of <b>5f</b> |      |
| e. NMR spectra of <b>5g</b> |      |
| f. NMR spectra of <b>5h</b> | S108 |
| g. NMR spectra of <b>5j</b> | S113 |
| h. NMR spectra of <b>5l</b> | S115 |
| i. NMR spectra of <b>5m</b> | S116 |
|                             | S122 |
|                             | S123 |
|                             | S124 |
|                             | S125 |
|                             | S126 |

1. Crystallographic data

a. Crystallization

The 5-isobutyl-3-(4-methoxybenzylideneamino)-2-(4-methoxyphenyl)imidazolidin-4-one **5f** crystallized after filtration of ethanol as a single diastereoisomer with the (1*R*, 2*S*, 5*S*) (*E*) configuration. The ORTEP plate of this compound is presented below.



ORTEP of the compound **5f** at 30 % probability level (view 1).



ORTEP of the compound **5f** at 30 % probability level (view 2).

b. Photographs of crystals **5f**



c. Main structure information of **5f**

|                                           |                                                                                                                      |
|-------------------------------------------|----------------------------------------------------------------------------------------------------------------------|
| Formula                                   | C <sub>22</sub> H <sub>27</sub> N <sub>3</sub> O <sub>3</sub>                                                        |
| Molecular weight                          | 381.46                                                                                                               |
| Compound name                             | (2 <i>S</i> ,3 <i>E</i> ,5 <i>S</i> )-5-isobutyl-3-(4-methoxybenzylideneamino)-2-(4-methoxyphenyl)imidazolidin-4-one |
| Space group                               | <i>P</i> 2 <sub>1</sub>                                                                                              |
| Space group (name Hall)                   | P 2 <sub>y</sub> b                                                                                                   |
| Cell setting                              | Monoclinic                                                                                                           |
| Cell lengths                              | <b>a</b> 13.957(2) <b>b</b> 5.4550(9) (6) <b>c</b> 14.7103(19)                                                       |
| Cell angles                               | $\alpha$ 90 $\beta$ 107.844(9) $\gamma$ 90                                                                           |
| Cell volume                               | 1066.1(3)                                                                                                            |
| <i>Z</i>                                  | 2                                                                                                                    |
| F (000)                                   | 408                                                                                                                  |
| D <sub>x</sub> (g.cm <sup>-3</sup> )      | 1.188                                                                                                                |
| Mo <i>K</i> $\alpha$ radiation, $\lambda$ | 0.71073 Å                                                                                                            |
| $\theta$                                  | 2.4-25.0°                                                                                                            |
| $\mu$                                     | 0.08 mm <sup>-1</sup>                                                                                                |
| h. k .l max                               | 16, 6, 17                                                                                                            |
| Temperature (K)                           | 200                                                                                                                  |

## 2. Water sensitivity of the products **5a-m**

The products **5a-m** were prepared in water from **3** and **4**, however subsequent analyses showed the very water-sensitive character of **5**. This unexpected result needs to be clarify.

Three non-refutable observations can be made:

- The reactants **3** and **4** are soluble in water therefore a single phase is observed, as specified in the article.
- The products **5** are not soluble in water.
- The products **5** are stable in the solid state at room temperature.



The efficient collision between the molecules **3** and **4** leads to the formation of the molecule **5** by the well-known condensation mechanism. This process is reversible in water according to a molecular point of view since a single molecule **5** is surrounded by water molecules. However, as time goes by, the hydrophobic property of **5** suggests that the collisions of molecules of **5** each other give birth to aggregates. These ones are not soluble and the internal molecules **5** are protected from the hydrolysis, especially if the reactivity center (iminic carbon) is not correctly oriented vis-a-vis of water molecules. The addition of aggregates affords **5** as the sole solid product. It could be explained also the “procedure time” of 11 h which could be divided in a short microscopic “time reaction” and a longer macroscopic “aggregation time”.

This phenomenon explains that the isolation by simple filtration induces in this case a high purity of the products **5** since no reactants are inside the solid and they can only be formed at the interface, merging immediately with the liquid phase. After isolation, if the products **5** are dissolved in a non-aqueous solvent, each molecules **5** can easily interact with the residual water.

The both phenomena (interface and solubility) are so important that clarify why a solid aggregate of **5** can be much more stable in water (2 phases) compared to a solution of **5** in an organic solvent (1 phase). To conclude, the water sensitivity of **5** is depending on its physical state.

### 3. Calculations

#### a. Energies conversions

Gibbs energy is defined as the sum of the electronic and thermal free energies and it is given in hartrees.

Conversion factor from hartree to  $\text{kJ}\cdot\text{mol}^{-1}$  : 2625.499640

according to :  $1 \text{ hartree} = (4.35974434 \cdot 10^{-18} \text{ J} * 6.02214129 \cdot 10^{23} \text{ mol}^{-1}) / 10^3$  with the fundamental constant values taken from the *National Institute of Standards and Technology* (NIST – USA).

b. Species (1*R*<sub>N</sub>,2*R*<sub>C</sub>,5*S*<sub>C</sub>)-(E) out – **5b**

BMK/6-31++G(df,pd) in benzene CPCM-UFF

| Center Number | Atomic Number | Atomic Type | Coordinates (Å) |           |           |
|---------------|---------------|-------------|-----------------|-----------|-----------|
|               |               |             | X               | Y         | Z         |
| 1             | 6             | 0           | -0.577627       | 1.133109  | -0.021739 |
| 2             | 6             | 0           | -2.477455       | 0.295639  | 1.121562  |
| 3             | 1             | 0           | -2.995952       | 0.554333  | 2.049681  |
| 4             | 6             | 0           | -1.262714       | -0.593562 | 1.454354  |
| 5             | 8             | 0           | -1.243959       | -1.582383 | 2.149151  |
| 6             | 7             | 0           | -0.196528       | -0.055328 | 0.759210  |
| 7             | 7             | 0           | -1.896514       | 1.495000  | 0.512103  |
| 8             | 1             | 0           | -1.771563       | 2.211800  | 1.218174  |
| 9             | 6             | 0           | -3.441675       | -0.459800 | 0.195991  |
| 10            | 6             | 0           | -4.001468       | -1.675523 | 0.627786  |
| 11            | 6             | 0           | -3.785555       | 0.048539  | -1.063926 |
| 12            | 6             | 0           | -4.892786       | -2.371865 | -0.194822 |
| 13            | 1             | 0           | -3.725848       | -2.075330 | 1.599618  |
| 14            | 6             | 0           | -4.677451       | -0.653543 | -1.888154 |
| 15            | 1             | 0           | -3.365429       | 0.995810  | -1.385496 |
| 16            | 6             | 0           | -5.233257       | -1.863360 | -1.456967 |
| 17            | 1             | 0           | -5.319446       | -3.310431 | 0.147355  |
| 18            | 1             | 0           | -4.937981       | -0.251452 | -2.863312 |
| 19            | 1             | 0           | -5.926539       | -2.404076 | -2.094916 |
| 20            | 7             | 0           | 0.933237        | -0.819491 | 0.604241  |
| 21            | 6             | 0           | 1.801367        | -0.487785 | -0.278080 |
| 22            | 6             | 0           | 3.001690        | -1.296201 | -0.461936 |
| 23            | 6             | 0           | 4.012778        | -1.056475 | -1.367022 |
| 24            | 16            | 0           | 3.321771        | -2.741436 | 0.484958  |
| 25            | 6             | 0           | 5.059531        | -2.033464 | -1.312128 |
| 26            | 1             | 0           | 4.004951        | -0.209176 | -2.044551 |
| 27            | 6             | 0           | 4.826626        | -2.997904 | -0.366204 |
| 28            | 1             | 0           | 5.938433        | -2.014648 | -1.945713 |
| 29            | 1             | 0           | 5.445132        | -3.848769 | -0.111933 |
| 30            | 1             | 0           | 1.709349        | 0.386834  | -0.924544 |
| 31            | 6             | 0           | 0.400005        | 2.275509  | 0.141627  |
| 32            | 6             | 0           | 1.224639        | 2.538491  | 1.204614  |
| 33            | 16            | 0           | 0.527629        | 3.518863  | -1.088493 |
| 34            | 6             | 0           | 1.976317        | 3.752772  | 1.043661  |
| 35            | 1             | 0           | 1.306288        | 1.881044  | 2.063744  |
| 36            | 6             | 0           | 1.709205        | 4.390889  | -0.137372 |
| 37            | 1             | 0           | 2.683833        | 4.123899  | 1.776218  |
| 38            | 1             | 0           | 2.124158        | 5.315742  | -0.515345 |
| 39            | 1             | 0           | -0.662500       | 0.850579  | -1.081976 |



Gibbs energy= -1729.747165 h (T= 298.15K, P= 1 atm)



c. Species ( $1R_N, 2R_C, 5S_C$ )-(E) in **5b**

BMK/6-31++G(df,pd) in benzene CPCM-UFF

| Center Number | Atomic Number | Atomic Type | Coordinates (Å) |           |           |
|---------------|---------------|-------------|-----------------|-----------|-----------|
|               |               |             | X               | Y         | Z         |
| 1             | 6             | 0           | 0.726514        | 1.258663  | 0.262727  |
| 2             | 6             | 0           | 2.408836        | 0.264331  | -1.055343 |
| 3             | 1             | 0           | 2.844758        | 0.463515  | -2.039072 |
| 4             | 6             | 0           | 1.089117        | -0.518772 | -1.245907 |
| 5             | 8             | 0           | 0.923520        | -1.534583 | -1.892959 |
| 6             | 7             | 0           | 0.143866        | 0.144032  | -0.503887 |
| 7             | 7             | 0           | 2.000305        | 1.513287  | -0.409900 |
| 8             | 1             | 0           | 1.881692        | 2.245629  | -1.101088 |
| 9             | 6             | 0           | 3.392158        | -0.570788 | -0.225173 |
| 10            | 6             | 0           | 3.863081        | -1.791345 | -0.740509 |
| 11            | 6             | 0           | 3.833059        | -0.140175 | 1.033857  |
| 12            | 6             | 0           | 4.759407        | -2.570687 | -0.001574 |
| 13            | 1             | 0           | 3.520936        | -2.130616 | -1.713950 |
| 14            | 6             | 0           | 4.730477        | -0.924114 | 1.773880  |
| 15            | 1             | 0           | 3.488852        | 0.813232  | 1.420582  |
| 16            | 6             | 0           | 5.195210        | -2.139928 | 1.260192  |
| 17            | 1             | 0           | 5.116428        | -3.512039 | -0.409501 |
| 18            | 1             | 0           | 5.064934        | -0.580385 | 2.748712  |
| 19            | 1             | 0           | 5.893091        | -2.744691 | 1.832179  |
| 20            | 7             | 0           | -1.053018       | -0.360609 | -0.027033 |
| 21            | 6             | 0           | -1.687719       | -1.221643 | -0.736179 |
| 22            | 6             | 0           | -2.939723       | -1.783182 | -0.243536 |
| 23            | 6             | 0           | -3.736717       | -2.689835 | -0.908075 |
| 24            | 16            | 0           | -3.625857       | -1.359781 | 1.319844  |
| 25            | 6             | 0           | -4.910603       | -3.053533 | -0.173041 |
| 26            | 1             | 0           | -3.485458       | -3.079251 | -1.889041 |
| 27            | 6             | 0           | -4.986929       | -2.419104 | 1.040180  |
| 28            | 1             | 0           | -5.658434       | -3.750622 | -0.532675 |
| 29            | 1             | 0           | -5.760069       | -2.506151 | 1.792570  |
| 30            | 1             | 0           | -1.342253       | -1.565246 | -1.709141 |
| 31            | 6             | 0           | -0.163108       | 2.470662  | 0.309601  |
| 32            | 6             | 0           | -0.460908       | 3.236375  | 1.404246  |
| 33            | 16            | 0           | -0.917863       | 3.117555  | -1.143676 |
| 34            | 6             | 0           | -1.295132       | 4.365561  | 1.095873  |
| 35            | 1             | 0           | -0.098907       | 3.001921  | 2.399661  |
| 36            | 6             | 0           | -1.619316       | 4.435765  | -0.231148 |
| 37            | 1             | 0           | -1.637419       | 5.082402  | 1.833333  |
| 38            | 1             | 0           | -2.237813       | 5.164990  | -0.737613 |
| 39            | 1             | 0           | 0.896739        | 0.923105  | 1.295345  |

Gibbs energy= -1729.748995 h (T= 298.15K, P= 1 atm)



d. Species (1R<sub>N</sub>,2R<sub>C</sub>,5S<sub>C</sub>)-(Z) – 5b

BMK/6-31++G(df,pd) benzene CPCM-UFF

| Center Number | Atomic Number | Atomic Type | Coordinates (Å) |           |           |
|---------------|---------------|-------------|-----------------|-----------|-----------|
|               |               |             | X               | Y         | Z         |
| 1             | 6             | 0           | -1.529593       | 0.079008  | -1.063880 |
| 2             | 6             | 0           | -0.289720       | -1.561126 | 0.133975  |
| 3             | 1             | 0           | -0.974055       | -2.070864 | 0.832245  |
| 4             | 6             | 0           | -0.043264       | -0.164043 | 0.737528  |
| 5             | 8             | 0           | 0.535956        | 0.097429  | 1.767741  |
| 6             | 7             | 0           | -0.629892       | 0.739221  | -0.119976 |
| 7             | 7             | 0           | -0.901479       | -1.243343 | -1.154542 |
| 8             | 1             | 0           | -1.559101       | -1.949110 | -1.464549 |
| 9             | 6             | 0           | 0.993276        | -2.375182 | 0.029575  |
| 10            | 6             | 0           | 1.371512        | -3.204727 | 1.095670  |
| 11            | 6             | 0           | 1.822828        | -2.278383 | -1.097728 |
| 12            | 6             | 0           | 2.568212        | -3.929674 | 1.038866  |
| 13            | 1             | 0           | 0.730211        | -3.283579 | 1.969960  |
| 14            | 6             | 0           | 3.017840        | -3.006250 | -1.156387 |
| 15            | 1             | 0           | 1.516581        | -1.641793 | -1.921835 |
| 16            | 6             | 0           | 3.394328        | -3.832681 | -0.088637 |
| 17            | 1             | 0           | 2.850422        | -4.570492 | 1.869354  |
| 18            | 1             | 0           | 3.652619        | -2.928425 | -2.034670 |
| 19            | 1             | 0           | 4.319468        | -4.399982 | -0.136841 |
| 20            | 7             | 0           | -0.982790       | 2.034803  | 0.289817  |
| 21            | 6             | 0           | -0.019487       | 2.857010  | 0.496050  |
| 22            | 1             | 0           | -0.354788       | 3.822345  | 0.877450  |
| 23            | 6             | 0           | 1.420771        | 2.792969  | 0.256457  |
| 24            | 6             | 0           | 2.270593        | 3.824407  | 0.614188  |
| 25            | 16            | 0           | 2.299465        | 1.550335  | -0.626099 |
| 26            | 6             | 0           | 3.620961        | 3.624314  | 0.198740  |
| 27            | 1             | 0           | 1.925212        | 4.697658  | 1.157705  |
| 28            | 6             | 0           | 3.784058        | 2.446865  | -0.488216 |
| 29            | 1             | 0           | 4.427841        | 4.319475  | 0.397859  |
| 30            | 1             | 0           | 4.691455        | 2.044976  | -0.920572 |
| 31            | 6             | 0           | -2.984756       | 0.086472  | -0.629219 |
| 32            | 6             | 0           | -4.060626       | 0.449045  | -1.396141 |
| 33            | 16            | 0           | -3.502186       | -0.459488 | 0.962510  |
| 34            | 6             | 0           | -5.320931       | 0.291644  | -0.721224 |
| 35            | 1             | 0           | -3.958996       | 0.819399  | -2.411092 |
| 36            | 6             | 0           | -5.182569       | -0.188205 | 0.551966  |
| 37            | 1             | 0           | -6.279249       | 0.533160  | -1.166736 |
| 38            | 1             | 0           | -5.951724       | -0.395854 | 1.284050  |
| 39            | 1             | 0           | -1.481473       | 0.586556  | -2.033398 |



Gibbs energy= -1729.740789 h (T= 298.15K, P= 1 atm)

e. Species ( $1R_N, 2S_C, 5S_C$ )-(E) out -5b

BMK/6-31++G(df,pd) in benzene CPCM-UFF

| Center Number | Atomic Number | Atomic Type | Coordinates (Å) |           |           |
|---------------|---------------|-------------|-----------------|-----------|-----------|
|               |               |             | X               | Y         | Z         |
| 1             | 6             | 0           | 0.301295        | 0.462569  | -1.408099 |
| 2             | 6             | 0           | 1.896670        | -1.286105 | -1.374474 |
| 3             | 1             | 0           | -0.358194       | 0.882281  | -2.177314 |
| 4             | 1             | 0           | 2.201691        | -2.027646 | -2.120433 |
| 5             | 6             | 0           | 0.580917        | -1.789974 | -0.741129 |
| 6             | 8             | 0           | 0.362943        | -2.881610 | -0.267650 |
| 7             | 7             | 0           | -0.308062       | -0.741737 | -0.834257 |
| 8             | 7             | 0           | 1.526624        | -0.031282 | -2.043441 |
| 9             | 1             | 0           | 1.339010        | -0.214708 | -3.022336 |
| 10            | 6             | 0           | 3.021144        | -1.150692 | -0.339035 |
| 11            | 6             | 0           | 3.368004        | -2.264230 | 0.446571  |
| 12            | 6             | 0           | 3.739586        | 0.044499  | -0.196123 |
| 13            | 6             | 0           | 4.416414        | -2.177729 | 1.369848  |
| 14            | 1             | 0           | 2.806929        | -3.188341 | 0.340041  |
| 15            | 6             | 0           | 4.791027        | 0.127140  | 0.727582  |
| 16            | 1             | 0           | 3.473328        | 0.900353  | -0.806977 |
| 17            | 6             | 0           | 5.132898        | -0.980998 | 1.512182  |
| 18            | 1             | 0           | 4.673157        | -3.043129 | 1.974138  |
| 19            | 1             | 0           | 5.342611        | 1.057575  | 0.830240  |
| 20            | 1             | 0           | 5.950228        | -0.914406 | 2.224718  |
| 21            | 7             | 0           | -1.596168       | -0.889628 | -0.392859 |
| 22            | 6             | 0           | -2.383828       | 0.121070  | -0.430137 |
| 23            | 6             | 0           | 0.572232        | 1.503989  | -0.333640 |
| 24            | 6             | 0           | 0.483158        | 1.374091  | 1.025963  |
| 25            | 16            | 0           | 1.123692        | 3.110917  | -0.783533 |
| 26            | 6             | 0           | 0.863423        | 2.567360  | 1.733663  |
| 27            | 1             | 0           | 0.161145        | 0.458800  | 1.510984  |
| 28            | 6             | 0           | 1.230354        | 3.586140  | 0.898898  |
| 29            | 1             | 0           | 0.860612        | 2.650616  | 2.814414  |
| 30            | 1             | 0           | 1.558637        | 4.585010  | 1.154008  |
| 31            | 6             | 0           | -3.771413       | -0.011403 | -0.003210 |
| 32            | 6             | 0           | -4.711949       | 0.996092  | 0.028306  |
| 33            | 16            | 0           | -4.450917       | -1.535670 | 0.545921  |
| 34            | 6             | 0           | -5.991264       | 0.554752  | 0.497728  |
| 35            | 1             | 0           | -4.491097       | 2.014290  | -0.274209 |
| 36            | 6             | 0           | -6.002091       | -0.779652 | 0.813075  |
| 37            | 1             | 0           | -6.856220       | 1.200318  | 0.595117  |
| 38            | 1             | 0           | -6.826746       | -1.371434 | 1.188688  |
| 39            | 1             | 0           | -2.079236       | 1.116365  | -0.762009 |

Gibbs energy= -1729.748494 h (T= 298.15K, P= 1 atm)



f. Species (1R<sub>N</sub>,2S<sub>C</sub>,5S<sub>C</sub>)-(Z) – 5b

BMK/6-31++G(df,pd) in benzene CPCM-UFF

| Center Number | Atomic Number | Atomic Type | Coordinates (Å) |           |           |
|---------------|---------------|-------------|-----------------|-----------|-----------|
|               |               |             | X               | Y         | Z         |
| 1             | 6             | 0           | 0.234064        | 1.213408  | -0.890881 |
| 2             | 6             | 0           | 0.403443        | -1.143145 | -0.950440 |
| 3             | 1             | 0           | -0.218297       | 1.995462  | -1.507455 |
| 4             | 1             | 0           | -0.134791       | -1.886739 | -1.549772 |
| 5             | 6             | 0           | -0.557887       | -0.709832 | 0.182072  |
| 6             | 8             | 0           | -1.054396       | -1.404108 | 1.042507  |
| 7             | 7             | 0           | -0.781105       | 0.636008  | -0.001968 |
| 8             | 7             | 0           | 0.611742        | 0.077805  | -1.739947 |
| 9             | 1             | 0           | 0.012658        | 0.062080  | -2.557169 |
| 10            | 6             | 0           | 1.677711        | -1.801072 | -0.412093 |
| 11            | 6             | 0           | 1.563174        | -2.979072 | 0.347197  |
| 12            | 6             | 0           | 2.949769        | -1.281819 | -0.688786 |
| 13            | 6             | 0           | 2.708015        | -3.622764 | 0.829683  |
| 14            | 1             | 0           | 0.578037        | -3.378565 | 0.569668  |
| 15            | 6             | 0           | 4.095683        | -1.931637 | -0.208365 |
| 16            | 1             | 0           | 3.038257        | -0.374891 | -1.277439 |
| 17            | 6             | 0           | 3.979681        | -3.101802 | 0.551463  |
| 18            | 1             | 0           | 2.606576        | -4.529370 | 1.419623  |
| 19            | 1             | 0           | 5.076653        | -1.521657 | -0.431737 |
| 20            | 1             | 0           | 4.868818        | -3.604604 | 0.921335  |
| 21            | 7             | 0           | -1.339797       | 1.441020  | 1.003631  |
| 22            | 6             | 0           | -2.586762       | 1.260190  | 1.247901  |
| 23            | 1             | 0           | -2.955881       | 1.861767  | 2.079354  |
| 24            | 6             | 0           | -3.623796       | 0.465922  | 0.591657  |
| 25            | 6             | 0           | -4.915929       | 0.388403  | 1.076541  |
| 26            | 16            | 0           | -3.495760       | -0.381170 | -0.946560 |
| 27            | 6             | 0           | -5.802372       | -0.351631 | 0.236673  |
| 28            | 1             | 0           | -5.212948       | 0.854663  | 2.010274  |
| 29            | 6             | 0           | -5.179545       | -0.820071 | -0.892712 |
| 30            | 1             | 0           | -6.848082       | -0.523444 | 0.462611  |
| 31            | 1             | 0           | -5.605215       | -1.402083 | -1.700098 |
| 32            | 6             | 0           | 1.420713        | 1.776467  | -0.126545 |
| 33            | 6             | 0           | 1.757342        | 1.625467  | 1.190673  |
| 34            | 16            | 0           | 2.640106        | 2.705084  | -0.988947 |
| 35            | 6             | 0           | 3.007859        | 2.250498  | 1.531205  |
| 36            | 1             | 0           | 1.131796        | 1.100455  | 1.903123  |
| 37            | 6             | 0           | 3.600067        | 2.871731  | 0.466563  |
| 38            | 1             | 0           | 3.433484        | 2.236266  | 2.528148  |
| 39            | 1             | 0           | 4.531284        | 3.421603  | 0.434733  |



Gibbs energy= -1729.738151 h (T= 298.15K, P= 1 atm)

g. Species (1R<sub>N</sub>,2S<sub>C</sub>,5S<sub>C</sub>)-(Z) – 5b

BMK/6-31++G(df,pd) in benzene CPCM-UFF

| Center Number | Atomic Number | Atomic Type | Coordinates (Å) |           |           |
|---------------|---------------|-------------|-----------------|-----------|-----------|
|               |               |             | X               | Y         | Z         |
| 1             | 6             | 0           | -0.907713       | 1.582029  | -0.902267 |
| 2             | 6             | 0           | 1.445577        | 1.394446  | -1.109547 |
| 3             | 1             | 0           | -1.238978       | 2.070465  | -1.835997 |
| 4             | 1             | 0           | 1.729433        | 1.896080  | -2.049938 |
| 5             | 6             | 0           | 0.773104        | 0.075434  | -1.540348 |
| 6             | 8             | 0           | 1.300632        | -0.870497 | -2.081710 |
| 7             | 7             | 0           | -0.557929       | 0.193792  | -1.218320 |
| 8             | 7             | 0           | 0.368730        | 2.072784  | -0.392818 |
| 9             | 1             | 0           | 0.430916        | 3.083387  | -0.428821 |
| 10            | 6             | 0           | 2.697123        | 1.168127  | -0.274423 |
| 11            | 6             | 0           | 3.958449        | 1.186118  | -0.886454 |
| 12            | 6             | 0           | 2.601218        | 0.899375  | 1.100012  |
| 13            | 6             | 0           | 5.114749        | 0.938605  | -0.134595 |
| 14            | 1             | 0           | 4.035951        | 1.394543  | -1.950806 |
| 15            | 6             | 0           | 3.755526        | 0.654807  | 1.852305  |
| 16            | 1             | 0           | 1.621641        | 0.894143  | 1.568035  |
| 17            | 6             | 0           | 5.015571        | 0.673769  | 1.237013  |
| 18            | 1             | 0           | 6.087326        | 0.957131  | -0.618120 |
| 19            | 1             | 0           | 3.673621        | 0.449390  | 2.916091  |
| 20            | 1             | 0           | 5.910705        | 0.487274  | 1.823359  |
| 21            | 7             | 0           | -1.540825       | -0.546907 | -1.900100 |
| 22            | 6             | 0           | -1.648577       | -1.779185 | -1.560751 |
| 23            | 1             | 0           | -2.377589       | -2.332585 | -2.153881 |
| 24            | 6             | 0           | -1.030315       | -2.560418 | -0.493280 |
| 25            | 6             | 0           | -1.275754       | -3.910713 | -0.322207 |
| 26            | 16            | 0           | -0.010825       | -1.948459 | 0.804498  |
| 27            | 6             | 0           | -0.648537       | -4.463658 | 0.834425  |
| 28            | 1             | 0           | -1.890672       | -4.479252 | -1.012165 |
| 29            | 6             | 0           | 0.060116        | -3.523555 | 1.540987  |
| 30            | 1             | 0           | -0.721173       | -5.504686 | 1.125703  |
| 31            | 1             | 0           | 0.629661        | -3.661128 | 2.451322  |
| 32            | 6             | 0           | -2.000241       | 1.692338  | 0.137831  |
| 33            | 6             | 0           | -1.869278       | 1.683858  | 1.502288  |
| 34            | 16            | 0           | -3.685946       | 1.828543  | -0.334738 |
| 35            | 6             | 0           | -3.125686       | 1.785947  | 2.190109  |
| 36            | 1             | 0           | -0.904488       | 1.613950  | 1.990236  |
| 37            | 6             | 0           | -4.193045       | 1.873194  | 1.336162  |
| 38            | 1             | 0           | -3.222133       | 1.796682  | 3.269909  |
| 39            | 1             | 0           | -5.244498       | 1.956440  | 1.577700  |

Gibbs energy= -1729.738317 h (T= 298.15K, P= 1 atm)



h. Species (1S<sub>N</sub>,2R<sub>C</sub>,5S<sub>C</sub>)-(E) out – **5b**

BMK/6-31++G(df,pd) in benzene CPCM-UFF

| Center Number | Atomic Number | Atomic Type | Coordinates (Å) |           |           |
|---------------|---------------|-------------|-----------------|-----------|-----------|
|               |               |             | X               | Y         | Z         |
| 1             | 6             | 0           | -0.341607       | 0.849012  | -0.953564 |
| 2             | 6             | 0           | -2.280689       | 0.210721  | 0.250755  |
| 3             | 1             | 0           | -2.419865       | 0.972664  | 1.029942  |
| 4             | 6             | 0           | -1.101790       | -0.681115 | 0.695676  |
| 5             | 8             | 0           | -1.105290       | -1.542080 | 1.544115  |
| 6             | 7             | 0           | -0.021030       | -0.269288 | -0.055239 |
| 7             | 7             | 0           | -1.807583       | 0.859195  | -0.989235 |
| 8             | 1             | 0           | -2.122147       | 0.311046  | -1.784586 |
| 9             | 6             | 0           | -3.581815       | -0.542327 | 0.051785  |
| 10            | 6             | 0           | -4.793320       | 0.023360  | 0.474076  |
| 11            | 6             | 0           | -3.593525       | -1.791507 | -0.591747 |
| 12            | 6             | 0           | -6.004008       | -0.646817 | 0.253778  |
| 13            | 1             | 0           | -4.788676       | 0.988100  | 0.974925  |
| 14            | 6             | 0           | -4.801094       | -2.462261 | -0.811838 |
| 15            | 1             | 0           | -2.658484       | -2.251217 | -0.903652 |
| 16            | 6             | 0           | -6.009514       | -1.890314 | -0.389590 |
| 17            | 1             | 0           | -6.936508       | -0.199929 | 0.586032  |
| 18            | 1             | 0           | -4.798113       | -3.431638 | -1.301856 |
| 19            | 1             | 0           | -6.946197       | -2.414428 | -0.556583 |
| 20            | 7             | 0           | 1.206067        | -0.846951 | 0.136506  |
| 21            | 6             | 0           | 2.215282        | -0.385325 | -0.505210 |
| 22            | 6             | 0           | 0.248567        | 2.165847  | -0.480124 |
| 23            | 6             | 0           | 0.724038        | 3.182107  | -1.266531 |
| 24            | 16            | 0           | 0.325081        | 2.592991  | 1.221266  |
| 25            | 6             | 0           | 1.152145        | 4.328438  | -0.512768 |
| 26            | 1             | 0           | 0.762580        | 3.121663  | -2.349476 |
| 27            | 6             | 0           | 0.997163        | 4.161705  | 0.836802  |
| 28            | 1             | 0           | 1.560172        | 5.227191  | -0.961141 |
| 29            | 1             | 0           | 1.242335        | 4.847535  | 1.636875  |
| 30            | 1             | 0           | 0.045462        | 0.648600  | -1.959300 |
| 31            | 6             | 0           | 3.529158        | -0.997804 | -0.349279 |
| 32            | 6             | 0           | 4.694661        | -0.587820 | -0.960232 |
| 33            | 16            | 0           | 3.805756        | -2.397510 | 0.676561  |
| 34            | 6             | 0           | 5.825611        | -1.393912 | -0.610699 |
| 35            | 1             | 0           | 4.737732        | 0.262771  | -1.632329 |
| 36            | 6             | 0           | 5.501126        | -2.402925 | 0.258702  |
| 37            | 1             | 0           | 6.828014        | -1.226233 | -0.986986 |
| 38            | 1             | 0           | 6.152840        | -3.153935 | 0.685922  |
| 39            | 1             | 0           | 2.165251        | 0.471684  | -1.180112 |

Gibbs energy= -1729.745735 h (T= 298.15K, P= 1 atm)



i. Species (1S<sub>N</sub>,2R<sub>C</sub>,5S<sub>C</sub>)-(E) in – 5b

BMK/6-31++G(df,pd) in benzene CPCM-UFF

| Center Number | Atomic Number | Atomic Type | Coordinates (Å) |           |           |
|---------------|---------------|-------------|-----------------|-----------|-----------|
|               |               |             | X               | Y         | Z         |
| 1             | 6             | 0           | -0.429304       | 0.997436  | -0.996691 |
| 2             | 6             | 0           | -2.141945       | 0.002638  | 0.276684  |
| 3             | 1             | 0           | -2.316425       | 0.679800  | 1.123832  |
| 4             | 6             | 0           | -0.813013       | -0.731784 | 0.560353  |
| 5             | 8             | 0           | -0.627713       | -1.632616 | 1.358002  |
| 6             | 7             | 0           | 0.119323        | -0.148392 | -0.253128 |
| 7             | 7             | 0           | -1.873472       | 0.798689  | -0.938752 |
| 8             | 1             | 0           | -2.179819       | 0.276730  | -1.753635 |
| 9             | 6             | 0           | -3.335686       | -0.918760 | 0.117428  |
| 10            | 6             | 0           | -4.565159       | -0.583508 | 0.701765  |
| 11            | 6             | 0           | -3.236778       | -2.090965 | -0.651589 |
| 12            | 6             | 0           | -5.686010       | -1.403516 | 0.516056  |
| 13            | 1             | 0           | -4.645888       | 0.319672  | 1.300937  |
| 14            | 6             | 0           | -4.354406       | -2.911188 | -0.837631 |
| 15            | 1             | 0           | -2.283041       | -2.372119 | -1.092796 |
| 16            | 6             | 0           | -5.582632       | -2.567476 | -0.255271 |
| 17            | 1             | 0           | -6.633949       | -1.132685 | 0.971962  |
| 18            | 1             | 0           | -4.265700       | -3.816817 | -1.430636 |
| 19            | 1             | 0           | -6.450062       | -3.205192 | -0.398534 |
| 20            | 7             | 0           | 1.478156        | -0.354490 | -0.343109 |
| 21            | 6             | 0           | 2.041345        | -1.263276 | 0.370599  |
| 22            | 6             | 0           | -0.021028       | 2.325143  | -0.369482 |
| 23            | 6             | 0           | 1.234810        | 2.775859  | -0.050095 |
| 24            | 16            | 0           | -1.241419       | 3.534400  | -0.004090 |
| 25            | 6             | 0           | 1.232346        | 4.101766  | 0.504832  |
| 26            | 1             | 0           | 2.127171        | 2.179634  | -0.201921 |
| 27            | 6             | 0           | -0.025367       | 4.637007  | 0.591776  |
| 28            | 1             | 0           | 2.128961        | 4.623278  | 0.820557  |
| 29            | 1             | 0           | -0.317727       | 5.609270  | 0.966245  |
| 30            | 1             | 0           | -0.072709       | 0.949639  | -2.029591 |
| 31            | 6             | 0           | 3.478944        | -1.474197 | 0.254217  |
| 32            | 6             | 0           | 4.225770        | -2.376172 | 0.980869  |
| 33            | 16            | 0           | 4.491738        | -0.565879 | -0.862477 |
| 34            | 6             | 0           | 5.620330        | -2.347028 | 0.653855  |
| 35            | 1             | 0           | 3.787133        | -3.031847 | 1.725609  |
| 36            | 6             | 0           | 5.912799        | -1.425297 | -0.317654 |
| 37            | 1             | 0           | 6.364711        | -2.980780 | 1.121604  |
| 38            | 1             | 0           | 6.876729        | -1.192387 | -0.751165 |
| 39            | 1             | 0           | 1.499059        | -1.892354 | 1.073386  |

Gibbs energy= -1729.746925 h (T= 298.15K, P= 1 atm)



j. Species (1S<sub>N</sub>,2R<sub>C</sub>,5S<sub>C</sub>)-(Z) – 5b

BMK/6-31++G(df,pd) in benzene CPCM-UFF

| Center Number | Atomic Number | Atomic Type | Coordinates (Å) |           |           |
|---------------|---------------|-------------|-----------------|-----------|-----------|
|               |               |             | X               | Y         | Z         |
| 1             | 6             | 0           | -1.498427       | 0.045756  | -1.086432 |
| 2             | 6             | 0           | -0.307111       | -1.575478 | 0.149929  |
| 3             | 1             | 0           | -1.009638       | -2.039452 | 0.854959  |
| 4             | 6             | 0           | -0.001405       | -0.168178 | 0.713860  |
| 5             | 8             | 0           | 0.585390        | 0.104068  | 1.737323  |
| 6             | 7             | 0           | -0.570965       | 0.732594  | -0.164882 |
| 7             | 7             | 0           | -0.978715       | -1.321899 | -1.132445 |
| 8             | 1             | 0           | -0.316755       | -1.407934 | -1.896206 |
| 9             | 6             | 0           | 0.920365        | -2.463463 | 0.047847  |
| 10            | 6             | 0           | 1.022366        | -3.604966 | 0.855151  |
| 11            | 6             | 0           | 1.970391        | -2.153201 | -0.833572 |
| 12            | 6             | 0           | 2.153547        | -4.428461 | 0.784576  |
| 13            | 1             | 0           | 0.214337        | -3.850273 | 1.539180  |
| 14            | 6             | 0           | 3.098348        | -2.977405 | -0.910000 |
| 15            | 1             | 0           | 1.916109        | -1.262531 | -1.455149 |
| 16            | 6             | 0           | 3.192879        | -4.117732 | -0.099943 |
| 17            | 1             | 0           | 2.219227        | -5.309575 | 1.416113  |
| 18            | 1             | 0           | 3.903960        | -2.726927 | -1.594215 |
| 19            | 1             | 0           | 4.069558        | -4.756010 | -0.159113 |
| 20            | 7             | 0           | -0.938059       | 2.021750  | 0.249354  |
| 21            | 6             | 0           | 0.002547        | 2.862753  | 0.478909  |
| 22            | 1             | 0           | -0.362948       | 3.819448  | 0.854662  |
| 23            | 6             | 0           | 1.449048        | 2.838428  | 0.269501  |
| 24            | 6             | 0           | 2.262342        | 3.896541  | 0.632045  |
| 25            | 16            | 0           | 2.381339        | 1.611110  | -0.577723 |
| 26            | 6             | 0           | 3.626441        | 3.730484  | 0.246303  |
| 27            | 1             | 0           | 1.881792        | 4.765727  | 1.158390  |
| 28            | 6             | 0           | 3.838441        | 2.551138  | -0.422329 |
| 29            | 1             | 0           | 4.408378        | 4.451245  | 0.453777  |
| 30            | 1             | 0           | 4.765834        | 2.170163  | -0.830152 |
| 31            | 6             | 0           | -2.947472       | 0.124755  | -0.647902 |
| 32            | 6             | 0           | -4.004549       | 0.533878  | -1.415497 |
| 33            | 16            | 0           | -3.484731       | -0.358763 | 0.955073  |
| 34            | 6             | 0           | -5.268489       | 0.457507  | -0.733072 |
| 35            | 1             | 0           | -3.889037       | 0.879621  | -2.437484 |
| 36            | 6             | 0           | -5.149206       | -0.004324 | 0.548442  |
| 37            | 1             | 0           | -6.214898       | 0.739334  | -1.180286 |
| 38            | 1             | 0           | -5.924423       | -0.159132 | 1.287044  |
| 39            | 1             | 0           | -1.436497       | 0.500883  | -2.078781 |

Gibbs energy = -1729.739811 h (T= 298.15K, P= 1 atm)





k. Species (1S<sub>N</sub>,2S<sub>C</sub>,5S<sub>C</sub>)-(E) out – 5b

BMK/6-31++G(df,pd) in benzene CPCM-UFF

| Center Number | Atomic Number | Atomic Type | Coordinates (Å) |           |           |
|---------------|---------------|-------------|-----------------|-----------|-----------|
|               |               |             | X               | Y         | Z         |
| 1             | 6             | 0           | 0.346712        | 0.822857  | -0.917945 |
| 2             | 6             | 0           | 2.240196        | -0.599029 | -1.010626 |
| 3             | 1             | 0           | -0.084516       | 0.866059  | -1.929506 |
| 4             | 1             | 0           | 2.298847        | -0.952299 | -2.049614 |
| 5             | 6             | 0           | 1.071473        | -1.368359 | -0.366094 |
| 6             | 8             | 0           | 1.055726        | -2.527705 | -0.026463 |
| 7             | 7             | 0           | 0.011490        | -0.481188 | -0.316584 |
| 8             | 7             | 0           | 1.811575        | 0.811536  | -0.999739 |
| 9             | 1             | 0           | 2.183835        | 1.264352  | -0.169370 |
| 10            | 6             | 0           | 3.582764        | -0.807377 | -0.338395 |
| 11            | 6             | 0           | 4.737393        | -0.980583 | -1.114577 |
| 12            | 6             | 0           | 3.691476        | -0.788106 | 1.062079  |
| 13            | 6             | 0           | 5.988654        | -1.127630 | -0.501419 |
| 14            | 1             | 0           | 4.658113        | -0.997916 | -2.198505 |
| 15            | 6             | 0           | 4.939826        | -0.935434 | 1.676304  |
| 16            | 1             | 0           | 2.799538        | -0.674081 | 1.674131  |
| 17            | 6             | 0           | 6.091598        | -1.104171 | 0.894695  |
| 18            | 1             | 0           | 6.876161        | -1.261503 | -1.112968 |
| 19            | 1             | 0           | 5.011518        | -0.926373 | 2.760018  |
| 20            | 1             | 0           | 7.060362        | -1.220754 | 1.371893  |
| 21            | 7             | 0           | -1.247708       | -0.988700 | -0.108211 |
| 22            | 6             | 0           | -2.271981       | -0.267102 | -0.377667 |
| 23            | 6             | 0           | -0.140299       | 1.990837  | -0.090278 |
| 24            | 6             | 0           | -0.309413       | 2.052443  | 1.268605  |
| 25            | 16            | 0           | -0.510210       | 3.528252  | -0.849888 |
| 26            | 6             | 0           | -0.740414       | 3.346007  | 1.721921  |
| 27            | 1             | 0           | -0.150787       | 1.199108  | 1.919513  |
| 28            | 6             | 0           | -0.892905       | 4.243511  | 0.699536  |
| 29            | 1             | 0           | -0.932221       | 3.588048  | 2.760938  |
| 30            | 1             | 0           | -1.202963       | 5.278723  | 0.749090  |
| 31            | 6             | 0           | -3.614906       | -0.795882 | -0.164736 |
| 32            | 6             | 0           | -4.799390       | -0.136228 | -0.413092 |
| 33            | 16            | 0           | -3.905465       | -2.413130 | 0.459702  |
| 34            | 6             | 0           | -5.956375       | -0.923277 | -0.105591 |
| 35            | 1             | 0           | -4.836697       | 0.877215  | -0.798714 |
| 36            | 6             | 0           | -5.632730       | -2.166975 | 0.371735  |
| 37            | 1             | 0           | -6.975384       | -0.577112 | -0.233769 |
| 38            | 1             | 0           | -6.300796       | -2.960670 | 0.680159  |
| 39            | 1             | 0           | -2.217592       | 0.752355  | -0.763613 |



Gibbs energy= -1729.742994 h (T= 298.15K, P= 1 atm)

I. Species (1S<sub>N</sub>,2S<sub>C</sub>,5S<sub>C</sub>)-(Z) – **5b**

BMK/6-31++G(df,pd) in benzene CPCM-UFF

| Center Number | Atomic Number | Atomic Type | Coordinates (Å) |           |           |
|---------------|---------------|-------------|-----------------|-----------|-----------|
|               |               |             | X               | Y         | Z         |
| 1             | 6             | 0           | 0.226331        | 1.229055  | -0.872930 |
| 2             | 6             | 0           | 0.400333        | -1.161001 | -0.923312 |
| 3             | 1             | 0           | -0.268871       | 1.985993  | -1.490496 |
| 4             | 1             | 0           | -0.178706       | -1.895334 | -1.499029 |
| 5             | 6             | 0           | -0.521690       | -0.705768 | 0.225483  |
| 6             | 8             | 0           | -1.002233       | -1.397028 | 1.096809  |
| 7             | 7             | 0           | -0.741244       | 0.636227  | 0.038507  |
| 8             | 7             | 0           | 0.564262        | 0.062310  | -1.705506 |
| 9             | 1             | 0           | 1.469306        | 0.150573  | -2.150186 |
| 10            | 6             | 0           | 1.649595        | -1.878306 | -0.402774 |
| 11            | 6             | 0           | 1.499582        | -3.204054 | 0.042374  |
| 12            | 6             | 0           | 2.921565        | -1.288887 | -0.364245 |
| 13            | 6             | 0           | 2.595790        | -3.923126 | 0.527692  |
| 14            | 1             | 0           | 0.516595        | -3.666633 | 0.012967  |
| 15            | 6             | 0           | 4.023893        | -2.013959 | 0.112411  |
| 16            | 1             | 0           | 3.068580        | -0.265474 | -0.695488 |
| 17            | 6             | 0           | 3.865855        | -3.329625 | 0.561072  |
| 18            | 1             | 0           | 2.461203        | -4.945176 | 0.870280  |
| 19            | 1             | 0           | 5.003532        | -1.545020 | 0.131081  |
| 20            | 1             | 0           | 4.721176        | -3.888776 | 0.929063  |
| 21            | 7             | 0           | -1.309219       | 1.454753  | 1.030740  |
| 22            | 6             | 0           | -2.560159       | 1.278343  | 1.258306  |
| 23            | 1             | 0           | -2.938027       | 1.886273  | 2.081215  |
| 24            | 6             | 0           | -3.589246       | 0.480603  | 0.595757  |
| 25            | 6             | 0           | -4.888588       | 0.413647  | 1.064429  |
| 26            | 16            | 0           | -3.441683       | -0.384432 | -0.930144 |
| 27            | 6             | 0           | -5.764877       | -0.333183 | 0.221188  |
| 28            | 1             | 0           | -5.196929       | 0.892954  | 1.987839  |
| 29            | 6             | 0           | -5.126109       | -0.817343 | -0.893235 |
| 30            | 1             | 0           | -6.814648       | -0.498374 | 0.432792  |
| 31            | 1             | 0           | -5.542585       | -1.406870 | -1.700045 |
| 32            | 6             | 0           | 1.404329        | 1.860161  | -0.142775 |
| 33            | 6             | 0           | 1.811211        | 1.711124  | 1.155261  |
| 34            | 16            | 0           | 2.538486        | 2.859985  | -1.048182 |
| 35            | 6             | 0           | 3.046297        | 2.389539  | 1.443960  |
| 36            | 1             | 0           | 1.247350        | 1.147914  | 1.889811  |
| 37            | 6             | 0           | 3.562812        | 3.045623  | 0.361240  |
| 38            | 1             | 0           | 3.517600        | 2.387028  | 2.420357  |
| 39            | 1             | 0           | 4.465307        | 3.638197  | 0.292986  |

Gibbs energy= -1729.736119 h (T= 298.15K, P= 1 atm)



m. Species (1S<sub>N</sub>,2S<sub>C</sub>,5S<sub>C</sub>)-(Z) – 5b

BMK/6-31++G(df,pd) in benzene CPCM-UFF

| Center Number | Atomic Number | Atomic Type | Coordinates (Å) |           |           |
|---------------|---------------|-------------|-----------------|-----------|-----------|
|               |               |             | X               | Y         | Z         |
| 1             | 6             | 0           | 0.891123        | -1.476486 | -0.998129 |
| 2             | 6             | 0           | -1.438100       | -1.217006 | -1.161333 |
| 3             | 1             | 0           | 1.182440        | -1.874993 | -1.980696 |
| 4             | 1             | 0           | -1.732636       | -1.617872 | -2.140919 |
| 5             | 6             | 0           | -0.744182       | 0.131163  | -1.458842 |
| 6             | 8             | 0           | -1.246938       | 1.131830  | -1.917398 |
| 7             | 7             | 0           | 0.595247        | -0.040484 | -1.156469 |
| 8             | 7             | 0           | -0.382988       | -2.058120 | -0.577973 |
| 9             | 1             | 0           | -0.439731       | -2.033895 | 0.436120  |
| 10            | 6             | 0           | -2.672193       | -1.090455 | -0.287360 |
| 11            | 6             | 0           | -3.924866       | -1.493723 | -0.769234 |
| 12            | 6             | 0           | -2.572515       | -0.571354 | 1.015260  |
| 13            | 6             | 0           | -5.064924       | -1.384962 | 0.038317  |
| 14            | 1             | 0           | -4.008054       | -1.892117 | -1.776929 |
| 15            | 6             | 0           | -3.708291       | -0.465817 | 1.824297  |
| 16            | 1             | 0           | -1.607795       | -0.242536 | 1.396509  |
| 17            | 6             | 0           | -4.958432       | -0.873761 | 1.336961  |
| 18            | 1             | 0           | -6.030338       | -1.701295 | -0.345725 |
| 19            | 1             | 0           | -3.620134       | -0.065652 | 2.830240  |
| 20            | 1             | 0           | -5.840446       | -0.790797 | 1.965181  |
| 21            | 7             | 0           | 1.573985        | 0.690422  | -1.852298 |
| 22            | 6             | 0           | 1.712202        | 1.929868  | -1.554520 |
| 23            | 1             | 0           | 2.451977        | 2.439319  | -2.173381 |
| 24            | 6             | 0           | 1.140223        | 2.779947  | -0.512409 |
| 25            | 6             | 0           | 1.473615        | 4.116321  | -0.387474 |
| 26            | 16            | 0           | 0.073488        | 2.290052  | 0.797820  |
| 27            | 6             | 0           | 0.882065        | 4.752677  | 0.744819  |
| 28            | 1             | 0           | 2.127905        | 4.617760  | -1.093013 |
| 29            | 6             | 0           | 0.108747        | 3.890606  | 1.481576  |
| 30            | 1             | 0           | 1.024321        | 5.796394  | 0.998871  |
| 31            | 1             | 0           | -0.453645       | 4.097422  | 2.383030  |
| 32            | 6             | 0           | 1.989456        | -1.715982 | 0.007145  |
| 33            | 6             | 0           | 2.411875        | -0.889800 | 1.015908  |
| 34            | 16            | 0           | 2.873761        | -3.232132 | 0.015288  |
| 35            | 6             | 0           | 3.458506        | -1.467329 | 1.814430  |
| 36            | 1             | 0           | 2.000945        | 0.101197  | 1.177232  |
| 37            | 6             | 0           | 3.811535        | -2.722607 | 1.399728  |
| 38            | 1             | 0           | 3.923646        | -0.961470 | 2.652792  |
| 39            | 1             | 0           | 4.562296        | -3.383348 | 1.812491  |

Gibbs energy= -1729,74359 h (T= 298.15K, P= 1 atm)



n. Species (1R<sub>N</sub>,2R<sub>C</sub>,5S<sub>C</sub>)-(E) out – 5f

BMK/6-31++G(df,pd) benzene CPCM-UFF

| Center Number | Atomic Number | Atomic Type | Coordinates (Å) |           |           |
|---------------|---------------|-------------|-----------------|-----------|-----------|
|               |               |             | X               | Y         | Z         |
| 1             | 6             | 0           | -1.622412       | 0.060365  | -0.225168 |
| 2             | 6             | 0           | -3.164101       | -1.468622 | 0.741056  |
| 3             | 1             | 0           | -3.797072       | -1.445157 | 1.634600  |
| 4             | 6             | 0           | -1.738123       | -1.867006 | 1.148428  |
| 5             | 8             | 0           | -1.410676       | -2.846373 | 1.783007  |
| 6             | 7             | 0           | -0.895860       | -0.924014 | 0.598405  |
| 7             | 7             | 0           | -3.022697       | -0.115460 | 0.179329  |
| 8             | 1             | 0           | -3.236901       | 0.576483  | 0.890092  |
| 9             | 7             | 0           | 0.453549        | -1.190543 | 0.571057  |
| 10            | 6             | 0           | 1.209705        | -0.519893 | -0.215529 |
| 11            | 1             | 0           | 0.835144        | 0.266885  | -0.873147 |
| 12            | 6             | 0           | -3.729889       | -2.503532 | -0.260958 |
| 13            | 6             | 0           | -5.272835       | -2.551239 | -0.334701 |
| 14            | 1             | 0           | -5.640465       | -2.783868 | 0.675261  |
| 15            | 1             | 0           | -3.367090       | -3.494704 | 0.037120  |
| 16            | 6             | 0           | -5.710322       | -3.689869 | -1.277736 |
| 17            | 1             | 0           | -5.300769       | -4.654707 | -0.957855 |
| 18            | 1             | 0           | -6.802622       | -3.773030 | -1.306627 |
| 19            | 1             | 0           | -5.360014       | -3.493035 | -2.299052 |
| 20            | 6             | 0           | -5.901104       | -1.217792 | -0.783467 |
| 21            | 1             | 0           | -5.650170       | -0.397492 | -0.105286 |
| 22            | 1             | 0           | -5.538351       | -0.942521 | -1.781646 |
| 23            | 1             | 0           | -6.992600       | -1.308799 | -0.828777 |
| 24            | 1             | 0           | -3.319082       | -2.286385 | -1.257177 |
| 25            | 6             | 0           | 2.660335        | -0.779578 | -0.272148 |
| 26            | 6             | 0           | 3.446859        | -0.057332 | -1.192619 |
| 27            | 6             | 0           | 3.292084        | -1.722317 | 0.556851  |
| 28            | 6             | 0           | 4.819067        | -0.270497 | -1.286874 |
| 29            | 1             | 0           | 2.975584        | 0.678775  | -1.839499 |
| 30            | 6             | 0           | 4.669072        | -1.945482 | 0.476234  |
| 31            | 1             | 0           | 2.695654        | -2.281342 | 1.271265  |
| 32            | 6             | 0           | 5.440798        | -1.217877 | -0.451730 |
| 33            | 1             | 0           | 5.429011        | 0.280268  | -1.995996 |
| 34            | 1             | 0           | 5.128487        | -2.677759 | 1.129621  |
| 35            | 6             | 0           | 7.458724        | -2.286694 | 0.208376  |
| 36            | 1             | 0           | 8.506225        | -2.237762 | -0.092457 |
| 37            | 1             | 0           | 7.370164        | -2.020692 | 1.269496  |
| 38            | 1             | 0           | 7.083397        | -3.306707 | 0.056162  |
| 39            | 8             | 0           | 6.771821        | -1.362016 | -0.606511 |
| 40            | 1             | 0           | -1.500575       | -0.209440 | -1.285466 |
| 41            | 6             | 0           | -1.178988       | 1.499783  | -0.017054 |
| 42            | 6             | 0           | -1.261950       | 2.408888  | -1.074610 |
| 43            | 6             | 0           | -0.751473       | 1.960489  | 1.241903  |
| 44            | 6             | 0           | -0.933706       | 3.762392  | -0.901080 |
| 45            | 1             | 0           | -1.588668       | 2.067097  | -2.054001 |
| 46            | 6             | 0           | -0.416021       | 3.298024  | 1.431337  |
| 47            | 1             | 0           | -0.667884       | 1.263691  | 2.072203  |
| 48            | 6             | 0           | -0.507837       | 4.210312  | 0.360465  |
| 49            | 1             | 0           | -1.011573       | 4.440479  | -1.742463 |
| 50            | 1             | 0           | -0.077430       | 3.660492  | 2.396931  |
| 51            | 8             | 0           | -0.163145       | 5.484024  | 0.638627  |
| 52            | 6             | 0           | -0.254834       | 6.452727  | -0.382460 |
| 53            | 1             | 0           | 0.051363        | 7.399185  | 0.065588  |

```

54 1 0 0.413419 6.213320 -
1.219724
55 1 0 -1.284423 6.540276 -
0.752777

```

Gibbs energy= -1243.421019 h (T= 298.15K,  
P= 1 atm)



o. Species (1R<sub>N</sub>,2S<sub>C</sub>,5S<sub>C</sub>)-(E) out – 5f

BMK/6-31++G(df,pd) benzene CPCM-UFF

| Center Number | Atomic Number | Atomic Type | Coordinates (Å) |           |           |
|---------------|---------------|-------------|-----------------|-----------|-----------|
|               |               |             | X               | Y         | Z         |
| 1             | 6             | 0           | -1.129592       | -0.686771 | 1.313205  |
| 2             | 6             | 0           | -2.540513       | -2.293180 | 0.284496  |
| 3             | 1             | 0           | -0.602776       | -0.641658 | 2.274567  |
| 4             | 1             | 0           | -2.862322       | -3.299601 | 0.574421  |
| 5             | 6             | 0           | -1.125819       | -2.406728 | -0.308273 |
| 6             | 8             | 0           | -0.766492       | -3.143435 | -1.202094 |
| 7             | 7             | 0           | -0.351130       | -1.492215 | 0.366248  |
| 8             | 7             | 0           | -2.369931       | -1.455096 | 1.488690  |
| 9             | 1             | 0           | -2.259012       | -2.058225 | 2.297008  |
| 10            | 7             | 0           | 0.984741        | -1.375873 | 0.077401  |
| 11            | 6             | 0           | 1.673287        | -0.471421 | 0.668379  |
| 12            | 1             | 0           | 1.239146        | 0.241256  | 1.374527  |
| 13            | 6             | 0           | -3.534895       | -1.728657 | -0.757707 |
| 14            | 6             | 0           | -5.006115       | -2.137219 | -0.519956 |
| 15            | 1             | 0           | -5.047527       | -3.236136 | -0.533802 |
| 16            | 1             | 0           | -3.229304       | -2.096117 | -1.745439 |
| 17            | 6             | 0           | -5.883189       | -1.608175 | -1.671735 |
| 18            | 1             | 0           | -5.522252       | -1.962112 | -2.644196 |
| 19            | 1             | 0           | -6.922897       | -1.933551 | -1.553158 |
| 20            | 1             | 0           | -5.872408       | -0.510885 | -1.683890 |
| 21            | 6             | 0           | -5.551949       | -1.648796 | 0.835577  |
| 22            | 1             | 0           | -4.976959       | -2.049586 | 1.675373  |
| 23            | 1             | 0           | -5.501549       | -0.554510 | 0.892514  |
| 24            | 1             | 0           | -6.598564       | -1.951742 | 0.955540  |
| 25            | 1             | 0           | -3.451587       | -0.634170 | -0.769232 |
| 26            | 6             | 0           | -1.382281       | 0.740828  | 0.818575  |
| 27            | 6             | 0           | -1.959150       | 1.665920  | 1.709976  |
| 28            | 6             | 0           | -1.083332       | 1.162089  | -0.478580 |
| 29            | 6             | 0           | -2.237360       | 2.969155  | 1.312223  |
| 30            | 1             | 0           | -2.205375       | 1.352797  | 2.721943  |
| 31            | 6             | 0           | -1.356028       | 2.474965  | -0.900013 |
| 32            | 1             | 0           | -0.626854       | 0.473715  | -1.184394 |
| 33            | 6             | 0           | -1.937326       | 3.383408  | -0.002367 |
| 34            | 1             | 0           | -2.688000       | 3.684078  | 1.993693  |
| 35            | 1             | 0           | -1.106663       | 2.765281  | -1.913444 |
| 36            | 6             | 0           | 3.119614        | -0.339924 | 0.415631  |
| 37            | 6             | 0           | 3.844794        | 0.667901  | 1.083569  |
| 38            | 6             | 0           | 3.808034        | -1.191371 | -0.465762 |
| 39            | 6             | 0           | 5.213379        | 0.821494  | 0.880045  |
| 40            | 1             | 0           | 3.329674        | 1.336333  | 1.769499  |
| 41            | 6             | 0           | 5.181046        | -1.049417 | -0.680787 |
| 42            | 1             | 0           | 3.257431        | -1.969967 | -0.984547 |
| 43            | 6             | 0           | 5.892293        | -0.038051 | -0.004401 |
| 44            | 1             | 0           | 5.777701        | 1.594274  | 1.392240  |
| 45            | 1             | 0           | 5.682703        | -1.721910 | -1.366460 |
| 46            | 6             | 0           | 7.958477        | -0.658098 | -1.002486 |
| 47            | 1             | 0           | 8.990241        | -0.307295 | -0.952514 |
| 48            | 1             | 0           | 7.911756        | -1.704615 | -0.675131 |
| 49            | 1             | 0           | 7.597995        | -0.584977 | -2.036491 |
| 50            | 6             | 0           | -1.976892       | 5.139642  | -1.602377 |
| 51            | 1             | 0           | -2.536577       | 4.568391  | -2.354312 |
| 52            | 1             | 0           | -2.304028       | 6.180273  | -1.619226 |
| 53            | 1             | 0           | -0.905167       | 5.089928  | -1.834968 |

54 8 0 7.215442 0.177504 -  
0.141761  
55 8 0 -2.240384 4.664363 -  
0.301130

Gibbs energy= -1243.416625 h (T= 298.15K,  
P= 1 atm)



p. Species (1S<sub>N</sub>,2R<sub>C</sub>,5S<sub>C</sub>)-(E) out – 5f

BMK/6-31++G(df,pd) benzene CPCM-UFF

| Center Number | Atomic Number | Atomic Type | Coordinates (Å) |           |           |
|---------------|---------------|-------------|-----------------|-----------|-----------|
|               |               |             | X               | Y         | Z         |
| 1             | 6             | 0           | -1.271338       | -0.223569 | -0.954347 |
| 2             | 6             | 0           | -2.839363       | -1.490055 | 0.248751  |
| 3             | 1             | 0           | -3.178716       | -0.781366 | 1.019686  |
| 4             | 6             | 0           | -1.421517       | -1.940781 | 0.658001  |
| 5             | 8             | 0           | -1.122790       | -2.765983 | 1.494555  |
| 6             | 7             | 0           | -0.558092       | -1.188733 | -0.104590 |
| 7             | 7             | 0           | -2.635079       | -0.760784 | -1.014831 |
| 8             | 7             | 0           | 0.798989        | -1.296672 | 0.069386  |
| 9             | 6             | 0           | 1.565212        | -0.483713 | -0.558104 |
| 10            | 1             | 0           | 1.183316        | 0.310417  | -1.204477 |
| 11            | 6             | 0           | -3.821569       | -2.666802 | 0.179810  |
| 12            | 6             | 0           | -5.319658       | -2.289171 | 0.206497  |
| 13            | 1             | 0           | -5.481925       | -1.640469 | 1.078770  |
| 14            | 1             | 0           | -3.598979       | -3.303702 | 1.044300  |
| 15            | 6             | 0           | -6.169192       | -3.563205 | 0.387841  |
| 16            | 1             | 0           | -5.896664       | -4.098985 | 1.304068  |
| 17            | 1             | 0           | -7.235471       | -3.315934 | 0.437541  |
| 18            | 1             | 0           | -6.020583       | -4.243156 | -0.460928 |
| 19            | 6             | 0           | -5.766073       | -1.527298 | -1.057285 |
| 20            | 1             | 0           | -5.201741       | -0.600190 | -1.190166 |
| 21            | 1             | 0           | -5.611022       | -2.152112 | -1.947117 |
| 22            | 1             | 0           | -6.832987       | -1.282840 | -1.002138 |
| 23            | 1             | 0           | -3.606922       | -3.267200 | -0.717668 |
| 24            | 6             | 0           | 3.030883        | -0.561651 | -0.426759 |
| 25            | 6             | 0           | 3.826655        | 0.387727  | -1.100079 |
| 26            | 6             | 0           | 3.669504        | -1.543290 | 0.350347  |
| 27            | 6             | 0           | 5.214292        | 0.363104  | -0.998111 |
| 28            | 1             | 0           | 3.350284        | 1.154709  | -1.706130 |
| 29            | 6             | 0           | 5.061841        | -1.581354 | 0.462107  |
| 30            | 1             | 0           | 3.066520        | -2.281032 | 0.870736  |
| 31            | 6             | 0           | 5.842902        | -0.621962 | -0.212936 |
| 32            | 1             | 0           | 5.831244        | 1.094094  | -1.511178 |
| 33            | 1             | 0           | 5.524450        | -2.350252 | 1.069395  |
| 34            | 6             | 0           | 7.883073        | -1.521427 | 0.613336  |
| 35            | 1             | 0           | 8.942204        | -1.278469 | 0.516049  |
| 36            | 1             | 0           | 7.590414        | -1.459047 | 1.669206  |
| 37            | 1             | 0           | 7.705748        | -2.540792 | 0.247412  |
| 38            | 8             | 0           | 7.188694        | -0.571328 | -0.165284 |
| 39            | 1             | 0           | -0.842378       | -0.229314 | -1.962920 |
| 40            | 6             | 0           | -1.238760       | 1.202421  | -0.396624 |
| 41            | 6             | 0           | -1.649195       | 2.255263  | -1.222920 |
| 42            | 6             | 0           | -0.839462       | 1.497233  | 0.917571  |
| 43            | 6             | 0           | -1.675731       | 3.578611  | -0.764665 |
| 44            | 1             | 0           | -1.966394       | 2.044452  | -2.241734 |
| 45            | 6             | 0           | -0.858859       | 2.808678  | 1.392531  |
| 46            | 1             | 0           | -0.501441       | 0.701836  | 1.576184  |
| 47            | 6             | 0           | -1.278283       | 3.858205  | 0.555477  |
| 48            | 1             | 0           | -2.001856       | 4.368996  | -1.430341 |
| 49            | 1             | 0           | -0.547434       | 3.042478  | 2.405834  |
| 50            | 8             | 0           | -1.263115       | 5.094543  | 1.097197  |
| 51            | 6             | 0           | -1.668581       | 6.188317  | 0.305073  |
| 52            | 1             | 0           | -1.572157       | 7.073634  | 0.935212  |
| 53            | 1             | 0           | -1.026861       | 6.298127  | -0.578730 |
| 54            | 1             | 0           | -2.712629       | 6.081149  | -0.016672 |
| 55            | 1             | 0           | -2.681739       | -1.431250 | -1.778763 |

Gibbs energy= -1243.419348 h (T= 298.15K, P= 1 atm)



q. Species (1S<sub>N</sub>,2S<sub>C</sub>,5S<sub>C</sub>)-(E) out – 5f

BMK/6-31++G(df,pd) benzene CPCM-UFF

| Center Number | Atomic Number | Atomic Type | Coordinates (Å) |           |           |
|---------------|---------------|-------------|-----------------|-----------|-----------|
|               |               |             | X               | Y         | Z         |
| 1             | 6             | 0           | 1.419426        | -0.091730 | -0.899584 |
| 2             | 6             | 0           | 2.967465        | -1.842122 | -0.474911 |
| 3             | 1             | 0           | 3.071192        | -2.412967 | -1.410894 |
| 4             | 6             | 0           | 1.598919        | -2.227984 | 0.109891  |
| 5             | 8             | 0           | 1.305684        | -3.278273 | 0.639257  |
| 6             | 7             | 0           | 0.756912        | -1.164704 | -0.132538 |
| 7             | 7             | 0           | 2.847138        | -0.409502 | -0.782095 |
| 8             | 7             | 0           | -0.596812       | -1.350533 | 0.028461  |
| 9             | 6             | 0           | -1.411940       | -0.514405 | -0.497719 |
| 10            | 1             | 0           | -1.086083       | 0.354407  | -1.072514 |
| 11            | 6             | 0           | 4.119809        | -2.220023 | 0.467530  |
| 12            | 6             | 0           | 5.528269        | -2.246049 | -0.167283 |
| 13            | 1             | 0           | 5.479927        | -2.890273 | -1.056569 |
| 14            | 1             | 0           | 3.883604        | -3.219745 | 0.851350  |
| 15            | 6             | 0           | 6.526404        | -2.870735 | 0.828304  |
| 16            | 1             | 0           | 6.218452        | -3.880349 | 1.122195  |
| 17            | 1             | 0           | 7.529522        | -2.929388 | 0.391451  |
| 18            | 1             | 0           | 6.591483        | -2.257368 | 1.736309  |
| 19            | 6             | 0           | 6.015128        | -0.849544 | -0.603035 |
| 20            | 1             | 0           | 5.360530        | -0.408261 | -1.359946 |
| 21            | 1             | 0           | 6.043932        | -0.173122 | 0.261957  |
| 22            | 1             | 0           | 7.029976        | -0.907999 | -1.012613 |
| 23            | 1             | 0           | 4.116336        | -1.538641 | 1.332244  |
| 24            | 6             | 0           | -2.868981       | -0.685809 | -0.348136 |
| 25            | 6             | 0           | -3.733266       | 0.241584  | -0.964504 |
| 26            | 6             | 0           | -3.432593       | -1.742752 | 0.386890  |
| 27            | 6             | 0           | -5.115319       | 0.119462  | -0.852722 |
| 28            | 1             | 0           | -3.316024       | 1.066516  | -1.537059 |
| 29            | 6             | 0           | -4.817945       | -1.878242 | 0.509389  |
| 30            | 1             | 0           | -2.774931       | -2.462060 | 0.865254  |
| 31            | 6             | 0           | -5.668862       | -0.942985 | -0.113348 |
| 32            | 1             | 0           | -5.784648       | 0.830754  | -1.326197 |
| 33            | 1             | 0           | -5.219958       | -2.704089 | 1.084289  |
| 34            | 6             | 0           | -7.633678       | -2.022517 | 0.676806  |
| 35            | 1             | 0           | -8.708644       | -1.857691 | 0.589793  |
| 36            | 1             | 0           | -7.379095       | -3.006876 | 0.263750  |
| 37            | 1             | 0           | -7.343669       | -1.988137 | 1.734749  |
| 38            | 8             | 0           | -7.014755       | -0.986701 | -0.054739 |
| 39            | 1             | 0           | 3.233418        | 0.130559  | -0.012622 |
| 40            | 6             | 0           | 1.132622        | 1.309621  | -0.383312 |
| 41            | 6             | 0           | 1.050739        | 2.379217  | -1.278140 |
| 42            | 6             | 0           | 1.012956        | 1.567171  | 0.995194  |
| 43            | 6             | 0           | 0.856457        | 3.694056  | -0.827460 |
| 44            | 1             | 0           | 1.137616        | 2.194741  | -2.346575 |
| 45            | 6             | 0           | 0.817212        | 2.863759  | 1.460585  |
| 46            | 1             | 0           | 1.058310        | 0.742313  | 1.702007  |
| 47            | 6             | 0           | 0.739892        | 3.938451  | 0.551101  |
| 48            | 1             | 0           | 0.797509        | 4.501791  | -1.547162 |
| 49            | 1             | 0           | 0.716693        | 3.072505  | 2.521277  |
| 50            | 8             | 0           | 0.548683        | 5.158299  | 1.093025  |
| 51            | 6             | 0           | 0.438951        | 6.273695  | 0.236671  |
| 52            | 1             | 0           | -0.418377       | 6.168833  | -0.440790 |
| 53            | 1             | 0           | 0.288165        | 7.140426  | 0.881678  |
| 54            | 1             | 0           | 1.353260        | 6.413565  | -0.354180 |
| 55            | 1             | 0           | 1.103952        | -0.165598 | -1.951585 |

Gibbs energy= -1243.419867 h (T= 298.15K,  
P= 1 atm)



#### 4. Spectrum section for compounds characterization

##### a. NMR spectra of **5a**



<sup>1</sup>H NMR spectrum of compound **5a** in C<sub>6</sub>D<sub>6</sub>-d<sub>6</sub> at 400 MHz



<sup>1</sup>H NMR spectrum of compound **5a** in C<sub>6</sub>D<sub>6</sub>-d<sub>6</sub> at 400 MHz





$^{13}\text{C}$  NMR spectrum of compound **5a** in  $\text{C}_6\text{D}_6-d_6$  at 75 MHz



DEPT 135 NMR spectrum of compound **5a** in  $\text{C}_6\text{D}_6-d_6$  at 75 MHz



COSY NMR spectrum of compound **5a** in  $C_6D_6-d_6$



HSQC NMR spectrum of compound **5a** in  $C_6D_6-d_6$



HSQC NMR spectrum of compound **5a** in  $C_6D_6-d_6$  (zoom)



$^1H$ - $^{13}C$  HMBC NMR spectrum of compound **5a** in  $C_6D_6-d_6$



$^1\text{H}$ - $^{13}\text{C}$  HMBC NMR spectrum of compound **5a** in  $\text{C}_6\text{D}_6$ - $d_6$  (zoom)



NOESY NMR spectrum of compound **5a** in  $\text{C}_6\text{D}_6$ - $d_6$



NOESY NMR spectrum of compound **5a** in  $C_6D_6-d_6$  (deep cut)



$^1H$ - $^{15}N$  HMBC NMR spectrum of compound **5a** in  $C_6D_6-d_6$





$^{13}\text{C}$  NMR spectrum of compound **5b** in  $\text{C}_6\text{D}_6-d_6$  at 75 MHz (zoom)



DEPT 135 NMR spectrum of compound **5b** in  $\text{C}_6\text{D}_6-d_6$  at 75 MHz



DEPT 135 NMR spectrum of compound **5b** in  $C_6D_6-d_6$  at 75 MHz (zoom)



COSY NMR spectrum of compound **5b** in  $C_6D_6-d_6$







HSQC NMR spectrum of compound **5b** in  $C_6D_6-d_6$  (zoom)



$^1H$ - $^{13}C$  HMBC NMR spectrum of compound **5b** in  $C_6D_6-d_6$



$^1\text{H}$ - $^{13}\text{C}$  HMBC NMR spectrum of compound **5b** in  $\text{C}_6\text{D}_6$ - $d_6$  (zoom 1)



$^1\text{H}$ - $^{13}\text{C}$  HMBC NMR spectrum of compound **5b** in  $\text{C}_6\text{D}_6$ - $d_6$  (zoom 2)



NOESY NMR spectrum of compound **5b** in  $C_6D_6-d_6$



NOESY NMR spectrum of compound **5b** in  $C_6D_6-d_6$  (deep cut)



HMBC NMR  $^1\text{H}$ - $^{15}\text{N}$  spectrum of compound **5b** in  $\text{C}_6\text{D}_6$ - $d_6$

c. NMR spectra of **5c**



<sup>1</sup>H NMR spectrum of compound **5c** in C<sub>6</sub>D<sub>6</sub>-d<sub>6</sub> at 400 MHz



<sup>13</sup>C NMR spectrum of compound **5c** in C<sub>6</sub>D<sub>6</sub>-d<sub>6</sub> at 75 MHz



$^{13}\text{C}$  NMR spectrum of compound **5c** in  $\text{C}_6\text{D}_6-d_6$  at 75 MHz (zoom)



DEPT 135 NMR spectrum of compound **5c** in  $\text{C}_6\text{D}_6-d_6$  at 75 MHz



DEPT 135 NMR spectrum of compound **5c** in  $C_6D_6-d_6$  at 75 MHz (zoom)



COSY NMR spectrum of compound **5c** in  $C_6D_6-d_6$





COSY NMR spectrum of compound **5c** in  $C_6D_6-d_6$  (zoom)



HSQC NMR spectrum of compound **5c** in  $C_6D_6-d_6$



HSQC NMR spectrum of compound **5c** in  $C_6D_6-d_6$  (zoom)



$^1H$ - $^{13}C$  HMBC NMR spectrum of compound **5c** in  $C_6D_6-d_6$



$^1\text{H}$ - $^{13}\text{C}$  HMBC NMR spectrum of compound **5c** in  $\text{C}_6\text{D}_6$ - $d_6$  (zoom 1)



$^1\text{H}$ - $^{13}\text{C}$  HMBC NMR spectrum of compound **5c** in  $\text{C}_6\text{D}_6$ - $d_6$  (zoom 2)



$^1\text{H}$ - $^{13}\text{C}$  HMBC NMR spectrum of compound **5c** in  $\text{C}_6\text{D}_6$ - $d_6$  (zoom 3)



$^1\text{H}$ - $^{15}\text{N}$  HMBC NMR spectrum of compound **5c** in  $\text{C}_6\text{D}_6$ - $d_6$

d. NMR spectra of **5d**



<sup>1</sup>H NMR spectrum of compound **5d** in C<sub>6</sub>D<sub>6</sub>-d<sub>6</sub> at 300 MHz



<sup>13</sup>C NMR spectrum of compound **5d** in C<sub>6</sub>D<sub>6</sub>-d<sub>6</sub> at 75 MHz



$^{13}\text{C}$  NMR spectrum of compound **5d** in  $\text{C}_6\text{D}_6-d_6$  at 75 MHz (zoom)



Dept  $^{135}\text{C}$  NMR spectrum of compound **5d** in  $\text{C}_6\text{D}_6-d_6$  at 75 MHz



COSY NMR spectrum of compound **5d** in  $C_6D_6-d_6$



HSQC NMR spectrum of compound **5d** in  $C_6D_6-d_6$



HSQC NMR spectrum of compound **5d** in  $C_6D_6-d_6$  (zoom)



$^1H$ - $^{13}C$  HMBC NMR spectrum of compound **5d** in  $C_6D_6-d_6$





$^1\text{H}$ - $^{13}\text{C}$  HMBC NMR spectrum of compound **5d** in  $\text{C}_6\text{D}_6$ - $d_6$  (zoom)



$^1\text{H}$ - $^{15}\text{N}$  HMBC NMR spectrum of compound **5d** in  $\text{C}_6\text{D}_6$ - $d_6$

e. NMR spectra of **5e**



<sup>1</sup>H NMR spectrum of compound **5e** in C<sub>6</sub>D<sub>6</sub>-d<sub>6</sub> at 300 MHz



<sup>13</sup>C NMR spectrum of compound **5e** in C<sub>6</sub>D<sub>6</sub>-d<sub>6</sub> at 75 MHz



$^{13}\text{C}$  NMR spectrum of compound **5e** in  $\text{C}_6\text{D}_6-d_6$  at 75 MHz (zoom)



DEPT 135 NMR spectrum of compound **5e** in  $\text{C}_6\text{D}_6-d_6$  at 75 MHz



DEPT 135 NMR spectrum of compound **5e** in  $C_6D_6-d_6$  at 75 MHz (zoom)



COSY NMR spectrum of compound **5e** in  $C_6D_6-d_6$



HSQC NMR spectrum of compound **5e** in  $C_6D_6-d_6$



HSQC NMR spectrum of compound **5e** in  $C_6D_6-d_6$  (zoom)



$^1\text{H}$ - $^{13}\text{C}$  HMBC NMR spectrum of compound **5e** in  $\text{C}_6\text{D}_6$ - $d_6$



$^1\text{H}$ - $^{13}\text{C}$  HMBC NMR spectrum of compound **5e** in  $\text{C}_6\text{D}_6$ - $d_6$  (zoom)



NOESY NMR spectrum of compound **5e** in  $C_6D_6-d_6$



NOESY NMR spectrum of compound **5e** in  $C_6D_6-d_6$  (deep cut)

f. NMR spectra of **5f**



<sup>1</sup>H NMR spectrum of compound **5f** in C<sub>6</sub>D<sub>6</sub>-d<sub>6</sub> at 300 MHz



<sup>13</sup>C NMR spectrum of compound **5f** in C<sub>6</sub>D<sub>6</sub>-d<sub>6</sub> at 75 MHz





DEPT 135 NMR spectrum of compound **5f** in  $C_6D_6-d_6$  at 75 MHz



COSY NMR spectrum of compound **5f** in  $C_6D_6-d_6$



HSQC NMR spectrum of compound **5f** in  $C_6D_6-d_6$



HSQC NMR spectrum of compound **5f** in  $C_6D_6-d_6$  (zoom)



$^1\text{H}$ - $^{13}\text{C}$  HMBC spectrum of compound **5f** in  $\text{C}_6\text{D}_6-d_6$



$^1\text{H}$ - $^{13}\text{C}$  HMBC spectrum of compound **5f** in  $\text{C}_6\text{D}_6-d_6$  (zoom)



NOESY NMR spectrum of compound **5f** in  $C_6D_6-d_6$



NOESY NMR spectrum of compound **5f** in  $C_6D_6-d_6$  (deep cut)

g. NMR spectra of **5g**



<sup>1</sup>H NMR spectrum of compound **5g** in C<sub>6</sub>D<sub>6</sub>-d<sub>6</sub> at 300 MHz



<sup>13</sup>C NMR spectrum of compound **5g** in C<sub>6</sub>D<sub>6</sub>-d<sub>6</sub> at 75 MHz



DEPT 135 NMR spectrum of compound **5g** in  $C_6D_6-d_6$  at 75 MHz



COSY NMR spectrum of compound **5g** in  $C_6D_6-d_6$



HSQC NMR spectrum of compound **5g** in  $C_6D_6-d_6$



HSQC NMR spectrum of compound **5g** in  $C_6D_6-d_6$  (zoom)



$^1\text{H}$ - $^{13}\text{C}$  HMBC NMR spectrum of compound **5g** in  $\text{C}_6\text{D}_6$ - $d_6$



$^1\text{H}$ - $^{13}\text{C}$  HMBC NMR spectrum of compound **5g** in  $\text{C}_6\text{D}_6$ - $d_6$  (zoom)





NOESY NMR spectrum of compound **5g** in  $C_6D_6-d_6$



NOESY NMR spectrum of compound **5g** in  $C_6D_6-d_6$  (deep cut)



$^1\text{H}$ - $^{15}\text{N}$  HMBC NMR spectrum of compound **5g** in  $\text{C}_6\text{D}_6$ - $d_6$

h. NMR spectra of **5h**



<sup>1</sup>H NMR spectrum of compound **5h** in C<sub>6</sub>D<sub>6</sub>-d<sub>6</sub> at 300 MHz



<sup>13</sup>C NMR spectrum of compound **5h** in C<sub>6</sub>D<sub>6</sub>-d<sub>6</sub> at 75 MHz



$^{13}\text{C}$  NMR spectrum of compound **5h** in  $\text{C}_6\text{D}_6-d_6$  at 75 MHz (zoom)



DEPT 135 NMR spectrum of compound **5h** in  $\text{C}_6\text{D}_6-d_6$  at 75 MHz



DEPT 135 NMR spectrum of compound **5h** in  $C_6D_6-d_6$  at 75 MHz (zoom)



COSY NMR spectrum of compound **5h** in  $C_6D_6-d_6$



HSQC NMR spectrum of compound **5h** in  $C_6D_6-d_6$



HSQC NMR spectrum of compound **5h** in  $C_6D_6-d_6$  (zoom)



$^1\text{H}$ - $^{13}\text{C}$  HMBC NMR spectrum of compound **5h** in  $\text{C}_6\text{D}_6$ - $d_6$



$^1\text{H}$ - $^{13}\text{C}$  HMBC NMR spectrum of compound **5h** in  $\text{C}_6\text{D}_6$ - $d_6$  (zoom 1)



$^1\text{H}$ - $^{13}\text{C}$  HMBC NMR spectrum of compound **5h** in  $\text{C}_6\text{D}_6$ - $d_6$  (zoom 2)



NOESY NMR spectrum of compound **5h** in  $\text{C}_6\text{D}_6$ - $d_6$





NOESY NMR spectrum of compound **5h** in  $C_6D_6-d_6$  (deep cut)



$^1H$ - $^{15}N$  HMBC NMR spectrum of compound **5h** in  $C_6D_6-d_6$

j. NMR spectra of **5i**



<sup>1</sup>H NMR spectrum of compound **5i** in C<sub>6</sub>D<sub>6</sub>-d<sub>6</sub> at 300 MHz



<sup>13</sup>C NMR spectrum of compound **5i** in C<sub>6</sub>D<sub>6</sub>-d<sub>6</sub> at 75 MHz



<sup>13</sup>C NMR spectrum of compound **5i** in C<sub>6</sub>D<sub>6</sub>-d<sub>6</sub> at 75 MHz (zoom)



DEPT 135 NMR spectrum of compound **5i** in C<sub>6</sub>D<sub>6</sub>-d<sub>6</sub> at 75 MHz



DEPT 135 NMR spectrum of compound **5i** in  $C_6D_6-d_6$  at 75 MHz (zoom)



COSY NMR spectrum of compound **5i** in  $C_6D_6-d_6$



COSY NMR spectrum of compound **5i** in  $C_6D_6-d_6$  (zoom)



HSQC NMR spectrum of compound **5i** in  $C_6D_6-d_6$



HSQC NMR spectrum of compound **5i** in  $C_6D_6-d_6$  (zoom)



$^1H$ - $^{13}C$  HMBC NMR spectrum of compound **5i** in  $C_6D_6-d_6$



$^1\text{H}$ - $^{13}\text{C}$  HMBC NMR spectrum of compound **5i** in  $\text{C}_6\text{D}_6-d_6$  (zoom)



NOESY NMR spectrum of compound **5i** in  $\text{C}_6\text{D}_6-d_6$

i. NMR spectra of **5j**



<sup>1</sup>H NMR spectrum of compound **5j** in C<sub>6</sub>D<sub>6</sub>-d<sub>6</sub> at 400 MHz



<sup>13</sup>C NMR spectrum of compound **5j** in C<sub>6</sub>D<sub>6</sub>-d<sub>6</sub> at 75 MHz





$^{13}\text{C}$  NMR spectrum of compound **5j** in  $\text{C}_6\text{D}_6-d_6$  at 75 MHz (zoom)



DEPT 135 NMR spectrum of compound **5j** in  $\text{C}_6\text{D}_6-d_6$  at 75 MHz



DEPT 135 NMR spectrum of compound **5j** in  $C_6D_6-d_6$  at 75 MHz (zoom)



COSY NMR spectrum of compound **5j** in  $C_6D_6-d_6$



HSQC NMR spectrum of compound **5j** in  $C_6D_6-d_6$



HSQC NMR spectrum of compound **5j** in  $C_6D_6-d_6$  (zoom)



$^1\text{H}$ - $^{13}\text{C}$  HMBC NMR spectrum of compound **5j** in  $\text{C}_6\text{D}_6-d_6$



$^1\text{H}$ - $^{13}\text{C}$  HMBC NMR spectrum of compound **5j** in  $\text{C}_6\text{D}_6-d_6$  (zoom 1)



$^1\text{H}$ - $^{13}\text{C}$  HMBC NMR spectrum of compound **5j** in  $\text{C}_6\text{D}_6$ - $d_6$  (zoom 2)



NOESY NMR spectrum of compound **5j** in  $\text{C}_6\text{D}_6$ - $d_6$



NOESY NMR spectrum of compound **5j** in  $C_6D_6-d_6$  (deep cut)



$^1H$ - $^{15}N$  HMBC NMR spectrum of compound **5j** in  $C_6D_6-d_6$

k. NMR spectra of **5k**



<sup>1</sup>H NMR spectrum of compound **5k** in  $C_6D_6-d_6$  at 300 MHz



<sup>1</sup>H NMR spectrum of compound **5k** in  $C_6D_6-d_6$  at 300 MHz (zoom)



<sup>13</sup>C NMR spectrum of compound **5k** in C<sub>6</sub>D<sub>6</sub>-d<sub>6</sub> at 75 MHz



<sup>13</sup>C NMR spectrum of compound **5k** in C<sub>6</sub>D<sub>6</sub>-d<sub>6</sub> at 75 MHz (zoom)





DEPT 135 NMR spectrum of compound **5k** in  $C_6D_6-d_6$  at 75 MHz



DEPT 135 NMR spectrum of compound **5k** in  $C_6D_6-d_6$  at 75 MHz (zoom)



COSY NMR spectrum of compound **5k** in  $C_6D_6-d_6$



HSQC NMR spectrum of compound **5k** in  $C_6D_6-d_6$



HSQC NMR spectrum of compound **5k** in  $C_6D_6-d_6$  (zoom)



$^1H$ - $^{13}C$  HMBC NMR spectrum of compound **5k** in  $C_6D_6-d_6$



$^1\text{H}$ - $^{13}\text{C}$  HMBC NMR spectrum of compound **5k** in  $\text{C}_6\text{D}_6$ - $d_6$  (zoom)



NOESY NMR spectrum of compound **5k** in  $\text{C}_6\text{D}_6$ - $d_6$



NOESY NMR spectrum of compound **5k** in  $C_6D_6-d_6$  (deep cut)

# 1. NMR spectra of **51**



<sup>1</sup>H NMR spectrum of compound **51** in C<sub>6</sub>D<sub>6</sub>-d<sub>6</sub> at 400 MHz



<sup>1</sup>H NMR spectrum of compound **51** in C<sub>6</sub>D<sub>6</sub>-d<sub>6</sub> at 400 MHz



<sup>13</sup>C NMR spectrum of compound **5I** in C<sub>6</sub>D<sub>6</sub>-d<sub>6</sub> at 75 MHz



DEPT 135 NMR spectrum of compound **5I** in C<sub>6</sub>D<sub>6</sub>-d<sub>6</sub> at 75 MHz



COSY NMR spectrum of compound **5I** in  $C_6D_6-d_6$



COSY NMR spectrum of compound **5I** in  $C_6D_6-d_6$  (deep cut and zoom)





HSQC NMR spectrum of compound **5I** in  $C_6D_6-d_6$



HSQC NMR spectrum of compound **5I** in  $C_6D_6-d_6$  (zoom)



$^1\text{H}$ - $^{13}\text{C}$  HMBC NMR spectrum of compound **5I** in  $\text{C}_6\text{D}_6$ - $d_6$



$^1\text{H}$ - $^{13}\text{C}$  HMBC NMR spectrum of compound **5I** in  $\text{C}_6\text{D}_6$ - $d_6$  (zoom)



NOESY NMR spectrum of compound **5I** in  $C_6D_6-d_6$



$^1H$ - $^{15}N$  HMBC NMR spectrum of compound **5I** in  $C_6D_6-d_6$

m. NMR spectra of **5m**



<sup>1</sup>H NMR spectrum of compound **5m** in C<sub>6</sub>D<sub>6</sub>-d<sub>6</sub> at 300 MHz



<sup>1</sup>H NMR spectrum of compound **5m** in C<sub>6</sub>D<sub>6</sub>-d<sub>6</sub> at 300 MHz (zoom 1)



<sup>1</sup>H NMR spectrum of compound **5m** in C<sub>6</sub>D<sub>6</sub>-d<sub>6</sub> at 300 MHz (zoom 2)



<sup>13</sup>C NMR spectrum of compound **5m** in C<sub>6</sub>D<sub>6</sub>-d<sub>6</sub> at 75 MHz



$^{13}\text{C}$  NMR spectrum of compound **5m** in  $\text{C}_6\text{D}_6-d_6$  at 75 MHz (zoom)



Dept  $^{135}\text{C}$  NMR spectrum of compound **5m** in  $\text{C}_6\text{D}_6-d_6$  & some drops  $\text{MeCN}-d_3$  at 75 MHz



Dept 135 NMR spectrum of compound **5m** in C<sub>6</sub>D<sub>6</sub>-d<sub>6</sub> & some drops MeCN-d<sub>3</sub> at 75 MHz  
(zoom)



COSY NMR spectrum of compound **5m** in C<sub>6</sub>D<sub>6</sub>-d<sub>6</sub>



COSY NMR spectrum of compound **5m** in  $C_6D_6-d_6$  (zoom)



HSQC NMR spectrum of compound **5m** in  $C_6D_6-d_6$  & some drops  $MeCN-d_3$





HSQC NMR spectrum of compound **5m** in  $C_6D_6-d_6$  & some drops  $MeCN-d_3$  (zoom)



$^1H$ - $^{13}C$  HMBC NMR spectrum of compound **5m** in  $C_6D_6-d_6$  & some drops  $MeCN-d_3$



$^1\text{H}$ - $^{13}\text{C}$  HMBC NMR spectrum of compound **5m** in  $\text{C}_6\text{D}_6$ - $d_6$  & some drops  $\text{MeCN}$ - $d_3$  (zoom)



NOESY NMR spectrum of compound **5m** in  $\text{C}_6\text{D}_6$ - $d_6$



$^1\text{H}$ - $^{15}\text{N}$  HMBC NMR spectrum of compound **5m** in  $\text{C}_6\text{D}_6$ - $d_6$  & some drops  $\text{MeCN}$ - $d_3$

## 5. Spectrum section for kinetic behaviors

### a. NMR spectra of **5a**





HSQC NMR spectrum in CDCl<sub>3</sub>



HSQC NMR spectrum in CDCl<sub>3</sub> (zoom)



$^1\text{H} - ^{13}\text{C}$  HMBC NMR spectrum in  $\text{CDCl}_3$



$^1\text{H} - ^{13}\text{C}$  HMBC NMR spectrum in  $\text{CDCl}_3$  (zoom)



$^1\text{H} - ^{15}\text{N}$  HMBC NMR spectrum in  $\text{CDCl}_3$



$^1\text{H} - ^{13}\text{C}$  HMBC NMR spectrum in  $\text{CDCl}_3$  (zoom)



$^1\text{H}$  NMR spectrum in  $\text{C}_6\text{D}_6$  (400 MHz) immediately



$^1\text{H}$  NMR spectrum in  $\text{C}_6\text{D}_6$  (400 MHz) after 24 h



b. NMR spectra of **5b**



<sup>1</sup>H NMR spectrum in CDCl<sub>3</sub> (200 MHz) immediately



<sup>1</sup>H NMR spectrum in CDCl<sub>3</sub> (200 MHz) after 48 h



$^1\text{H}$  NMR spectrum in  $\text{C}_6\text{D}_6$  (300 MHz) immediately



$^1\text{H}$  NMR spectrum in  $\text{C}_6\text{D}_6$  (300 MHz) after 48 h

c. NMR spectra of **5c**



<sup>1</sup>H NMR spectrum in CDCl<sub>3</sub> (200 MHz) immediately



<sup>1</sup>H NMR spectrum in CDCl<sub>3</sub> (200 MHz) after 5 min

d. NMR spectra of **5f**



<sup>1</sup>H NMR spectrum in C<sub>6</sub>D<sub>6</sub> (400 MHz) immediately



<sup>1</sup>H NMR spectrum in C<sub>6</sub>D<sub>6</sub> (200 MHz) after 3 months at 4°C



$^1\text{H}$  NMR spectrum in  $\text{C}_6\text{D}_6$  (200 MHz) after 2 days at  $40^\circ\text{C}$



<sup>13</sup>C NMR spectrum in C<sub>6</sub>D<sub>6</sub> (75 MHz) immediately



<sup>13</sup>C NMR spectrum in C<sub>6</sub>D<sub>6</sub> (75 MHz) after 2 days at 40 °C



COSY NMR spectrum in  $C_6D_6$  immediately



COSY NMR spectrum in  $C_6D_6$  after 2 days at 40 °C



NOESY NMR spectrum in  $C_6D_6$  immediately



NOESY NMR spectrum in  $C_6D_6$  after 2 days at 40 °C





NOESY NMR spectrum in  $C_6D_6$  immediately (deep cut)



NOESY NMR spectrum in  $C_6D_6$  after 2 days at 40 °C (deep cut)

e. NMR spectra of **5g**



<sup>1</sup>H NMR spectrum in C<sub>6</sub>D<sub>6</sub> (400 MHz) immediately



<sup>1</sup>H NMR spectrum in C<sub>6</sub>D<sub>6</sub> (400 MHz) after 60 h

f. NMR spectra of **5h**



<sup>1</sup>H NMR spectrum in C<sub>6</sub>D<sub>6</sub> (400 MHz) immediately



<sup>1</sup>H NMR spectrum in C<sub>6</sub>D<sub>6</sub> (400 MHz) after 60 h

g. NMR spectra of **5j**



<sup>1</sup>H NMR spectrum in C<sub>6</sub>D<sub>6</sub> (400 MHz) immediately



<sup>1</sup>H NMR spectrum in C<sub>6</sub>D<sub>6</sub> (400 MHz) after 18 h

h. NMR spectra of **51**



<sup>1</sup>H NMR spectrum in C<sub>6</sub>D<sub>6</sub> (400 MHz) immediately



<sup>1</sup>H NMR spectrum in C<sub>6</sub>D<sub>6</sub> (400 MHz) after 6 h

i. NMR spectra of **5m**



<sup>1</sup>H NMR spectrum in C<sub>6</sub>D<sub>6</sub> + 3 drops of CD<sub>3</sub>CN (300 MHz) immediately



<sup>1</sup>H NMR spectrum in C<sub>6</sub>D<sub>6</sub> + 3 drops of CD<sub>3</sub>CN (300 MHz) after 18 h
